# Supplementary material
Source: HighWire-hosted journal article supplement (https://www.cmaj.ca/highwire/filestream/58866/field_highwire_adjunct_files/0/five-proctal-1-at.pdf)
Supplement: five-proctal-1-at.pdf [file five-proctal-1-at.pdf]

Appendix 1 (as supplied by authors): **Suggested management pathway for patients with possible proctalgia fugax<sup>1</sup>** (Summary of evidence for treatment modalities in footnote 2)

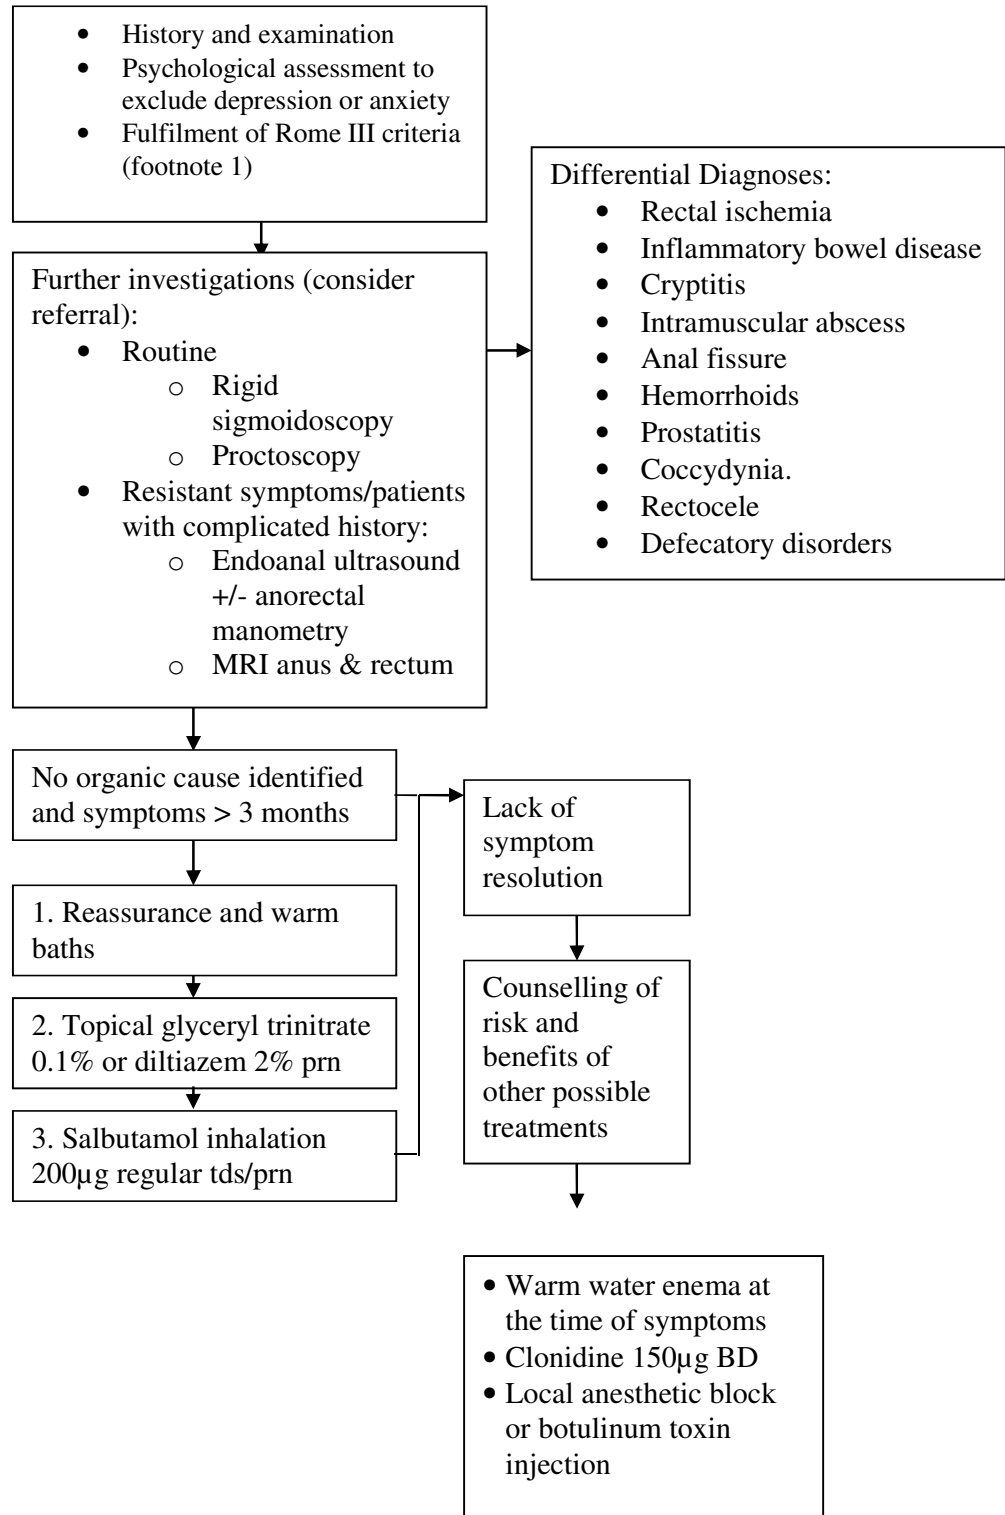

Footnote 1: Rome III criteria for functional anorectal pain (2)

|                  | <b>Chronic proctalgia</b>                                                                                                                                                                                                                                                                            | <b>Proctalgia fugax</b>                                                                                                                                                                                                          |
|------------------|------------------------------------------------------------------------------------------------------------------------------------------------------------------------------------------------------------------------------------------------------------------------------------------------------|----------------------------------------------------------------------------------------------------------------------------------------------------------------------------------------------------------------------------------|
| Must include all | <ol style="list-style-type: none"> <li>1. Chronic or recurrent rectal pain or aching</li> <li>2. Episodes last at least 20 minutes</li> <li>3. Exclusions of ischemia, inflammatory bowel disease, cryptitis, intramuscular abscess and fissure, hemorrhoids, prostatitis and coccydynia.</li> </ol> | <ol style="list-style-type: none"> <li>1. Recurrent episodes of pain localised to the anus or lower rectum</li> <li>2. Episodes last from seconds to minutes</li> <li>3. There is no anorectal pain between episodes.</li> </ol> |
|                  | <b>Levator ani syndrome</b>                                                                                                                                                                                                                                                                          |                                                                                                                                                                                                                                  |
|                  | - As for chronic proctalgia and tenderness during posterior traction on the puborectalis                                                                                                                                                                                                             |                                                                                                                                                                                                                                  |
|                  | <b>Unspecified Functional Anorectal Pain</b>                                                                                                                                                                                                                                                         |                                                                                                                                                                                                                                  |
|                  | - As for chronic proctalgia but no tenderness during posterior traction of puborectalis                                                                                                                                                                                                              |                                                                                                                                                                                                                                  |

Footnote 2: Summary of recommended treatment modalities for proctalgia fugax with USPSTF level of evidence

|           | <b>Authors</b>                                                   | <b>Treatment Modality</b> | <b>USPSTF level of evidence</b> |
|-----------|------------------------------------------------------------------|---------------------------|---------------------------------|
| (3-5)     | Penny. 1970; Karras & Angelo. 1951; Olsen. 2008                  | Tap/hot water enema       | B                               |
| (4, 6)    | Karras & Angelo. 1951; Potter & Bartolo. 2001                    | Hot baths                 | B                               |
| (7)       | Boquet <i>et al.</i> 1986                                        | Oral diltiazem            | B                               |
| (4, 8, 9) | Karras & Angelo. 1951; Clayton. 1985; Lowenstein & Cataldo. 1998 | Glyceryl trinitrate       | B                               |
| (10)      | Swain. 1987                                                      | Clonidine                 | D                               |
| (11, 12)  | Katsinelos <i>et al.</i> 2001 ;                                  | Botulinum toxin injection | A                               |

|         |                                                          |                                   |   |
|---------|----------------------------------------------------------|-----------------------------------|---|
|         | Sanchez Romero <i>et al.</i> 2006                        |                                   |   |
| (13-15) | Wright. 1985 ; Wright. 1991; Eckhardt <i>et al.</i> 1996 | Salbutamol inhalation             | A |
| (16)    | Bascom. 1998                                             | Pudendal nerve block              | D |
| (17)    | Waldman <i>et al.</i> 1991                               | Superior hypogastric plexus block | D |

1. Jeyarajah S, Chow A, Ziprin P, Tilney H, Purkayastha S. Proctalgia fugax, an evidence-based management pathway. *Int J Colorectal Dis.* Sep;25(9):1037-46.
2. Bharucha AE, Wald A, Enck P, Rao S. Functional anorectal disorders. *Gastroenterology.* 2006 Apr;130(5):1510-8.
3. Olsen B. Proctalgia fugax--a nightmare drowned in enema. *Colorectal Dis.* 2008 Jun;10(5):522-3.
4. Karras JD, Angelo G. Proctalgia fugax. *Am J Surg.* 1951 Nov;82(5):616-25.
5. Penny RW. The doctor's disease--proctalgia fugax. *Practitioner.* 1970 Jun;204(224):843-5.
6. Potter MA, Bartolo DC. Proctalgia fugax. *Eur J Gastroenterol Hepatol.* 2001 Nov;13(11):1289-90.
7. Boquet J, Moore N, Lhuintre JP, Boismare F. Diltiazem for proctalgia fugax. *Lancet.* 1986 Jun 28;1(8496):1493.
8. Lowenstein B, Cataldo PA. Treatment of proctalgia fugax with topical nitroglycerin: report of a case. *Dis Colon Rectum.* 1998 May;41(5):667-8.
9. Clayton MR. Therapy for proctodynia. *Med J Aust.* 1985 Nov 25;143(11):532.
10. Swain R. Oral clonidine for proctalgia fugax. *Gut.* 1987 Aug;28(8):1039-40.
11. Katsinelos P, Kalomenopoulou M, Christodoulou K, Katsiba D, Tsolkas P, Pilpilidis I, et al. Treatment of proctalgia fugax with botulinum A toxin. *Eur J Gastroenterol Hepatol.* 2001 Nov;13(11):1371-3.
12. Sanchez Romero AM, Arroyo Sebastian A, Perez Vicente FA, Serrano Paz P, Candela Polo F, Calpena Rico R. [Treatment of proctalgia fugax with botulinum toxin: results in 5 patients]. *Rev Clin Esp.* 2006 Mar;206(3):137-40.
13. Eckardt VF, Dodt O, Kanzler G, Bernhard G. Treatment of proctalgia fugax with salbutamol inhalation. *Am J Gastroenterol.* 1996 Apr;91(4):686-9.
14. Wright JE. Inhaled salbutamol for proctalgia fugax. *Lancet.* 1985 Sep 21;2(8456):659-60.
15. Wright JE. Trial of inhaled salbutamol for proctalgia fugax. *Lancet.* 1991 Feb 9;337(8737):359.
16. Bascom JU. Pudendal canal syndrome and proctalgia fugax: a mechanism creating pain. *Dis Colon Rectum.* 1998 Mar;41(3):406.
17. Waldman SD, Wilson WL, Kreps RD. Superior hypogastric plexus block using a single needle and computed tomography guidance: description of a modified technique. *Reg Anesth.* 1991 Sep-Oct;16(5):286-7.
